# Supplementary material for: Perioperative Analgesia and Patients’ Satisfaction in Spinal Anesthesia for Cesarean Section: Fentanyl Versus Morphine
Source: MDPI journal article supplement (doi:10.3390/jcm12196346), 2023-10-03
Supplement: s1 [file s1]

**Table S1.** Pain in patients who required rescue analgesia.

| Morphine group |        |                                         |                    |              |          |           |
|----------------|--------|-----------------------------------------|--------------------|--------------|----------|-----------|
| Age in years   | Smoker |                                         |                    | Satisfaction | AUPS72hR | AUPS 72hM |
| 28             | –      | <i>fentanyl 50 mcg intraoperatively</i> |                    | 5            | -29      | -28       |
| 29             | –      | <i>fentanyl 50 mcg intraoperatively</i> |                    | 5            | 0        | 114       |
| 29             | Yes    | <i>50 mg tramadol one dose in day 0</i> |                    | 5            | 0        | 191       |
| Fentanyl group |        |                                         |                    |              |          |           |
| Age in years   | Smoker |                                         |                    | Satisfaction | AUPS72hR | AUPS72hM  |
| 21             | –      | <i>50 mg tramadol</i>                   | <i>two doses</i>   | 3            | 146      | 350       |
| 22             | –      | <i>50 mg tramadol</i>                   | <i>two doses</i>   | 4            | 193      | 297       |
| 27             | –      | <i>50 mg tramadol</i>                   | <i>two doses</i>   | 3            | 205      | 296       |
| 30             | –      | <i>50 mg tramadol</i>                   | <i>three doses</i> | 2            | 296      | 466       |
| 33             | –      | <i>50 mg tramadol</i>                   | <i>two doses</i>   | 3            | 86       | 372       |
| 35             | –      | <i>50 mg tramadol</i>                   | <i>one dose</i>    | 4            | 86       | 188       |
| 36             | –      | <i>50 mg tramadol</i>                   | <i>one dose</i>    | 4            | 21       | 301       |
| 40             | –      | <i>50 mg tramadol</i>                   | <i>one dose</i>    | 4            | 16       | 196       |
| 42             | –      | <i>50 mg tramadol</i>                   | <i>two doses</i>   | 3            | 211      | 388       |
| 50             | –      | <i>50 mg tramadol</i>                   | <i>one dose</i>    | 3            | 86       | 171       |

**Table S2.** Analgesia-related adverse effects in patients who required rescue medication for pain.

| Morphine group |        |                                         |                    |        |          |        |          |                  |                  |
|----------------|--------|-----------------------------------------|--------------------|--------|----------|--------|----------|------------------|------------------|
| Age in years   | Smoker |                                         |                    | Satisf | Pruritus | Nausea | Vomiting | Const. dizziness | Effective treat. |
| 28             | –      | <i>fentanyl 50 mcg intraoperatively</i> |                    | 5      | Yes      | –      | –        | –                | Yes              |
| 29             | –      | <i>fentanyl 50 mcg intraoperatively</i> |                    | 5      | 2        | Yes    | Yes      | Yes              | Yes              |
| 29             | Yes    | <i>50 mg tramadol one dose in day 0</i> |                    | 5      | Yes      | –      | –        | Yes              | Yes              |
| Fentanyl group |        |                                         |                    |        |          |        |          |                  |                  |
| Age in years   | Smoker |                                         |                    | Satisf | Pruritus | Nausea | Vomiting | Const. dizziness | Effective treat. |
| 21             | –      | <i>50 mg tramadol</i>                   | <i>two doses</i>   | 3      | Yes      | Yes    | –        | –                | –                |
| 22             | –      | <i>50 mg tramadol</i>                   | <i>two doses</i>   | 4      | –        | –      | –        | –                | –                |
| 27             | –      | <i>50 mg tramadol</i>                   | <i>two doses</i>   | 3      | Yes      | –      | –        | Yes              | –                |
| 30             | –      | <i>50 mg tramadol</i>                   | <i>three doses</i> | 2      | –        | –      | –        | –                | –                |
| 33             | –      | <i>50 mg tramadol</i>                   | <i>two doses</i>   | 3      | Yes      | –      | –        | Yes              | –                |
| 35             | –      | <i>50 mg tramadol</i>                   | <i>one dose</i>    | 4      | Yes      | –      | –        | –                | Yes              |
| 36             | –      | <i>50 mg tramadol</i>                   | <i>one dose</i>    | 4      | –        | –      | –        | Yes              | –                |
| 40             | –      | <i>50 mg tramadol</i>                   | <i>one dose</i>    | 4      | –        | –      | –        | –                | –                |
| 42             | –      | <i>50 mg tramadol</i>                   | <i>two doses</i>   | 3      | Yes      | Yes    | –        | –                | –                |
| 50             | –      | <i>50 mg tramadol</i>                   | <i>one dose</i>    | 3      | –        | –      | –        | –                | –                |
